# Supplementary material
Source: PubMed Central journal article supplement (PMC7809616)
Supplement: jamacardiol-e207444-s001.pdf [file jamacardiol-e207444-s001.pdf]

## Supplemental Online Content

Starekova J, Bluemke DA, Bradham WS, et al. Evaluation for myocarditis in competitive student athletes recovering from coronavirus disease 2019 with cardiac magnetic resonance imaging. *JAMA Cardiol*. Published online January 14, 2021. doi:10.1001/jamacardio.2020.7444

### **eMethods**

**eTable 1.** Cardiac MRI Protocol.

**eTable 2.** Clinical and quantitative cardiac MRI parameters of two athletes recovering from COVID-19 with MRI findings consistent with myocarditis.

**eTable 3.** Number of athletes who had COVID-19, and documented specific symptoms (n=145; 37 female/108 male) during the course of their disease.

**eFigure.** Nonspecific inferior-septal right ventricular insertion point late gadolinium enhancement.

**eReferences.**

This supplemental material has been provided by the authors to give readers additional information about their work.

## eMethods

### *MRI Protocol*

The cardiac MRI protocol was designed to evaluate patients for myocarditis and is based on recommendations for standardized protocols from the Society for Cardiac Magnetic Resonance (SCMR)<sup>1</sup>. Prior to GBCA administration, acquisitions included cardiac-gated double inversion recovery fat-saturated T2-weighted fast spin echo acquired in double oblique short axis (SA) plane, with whole coverage of left ventricle (LV); three slice (apex-, mid- and LV base) modified Look-Locker inversion recovery T1-, and multi-echo fast spin echo T2-mapping in double oblique SA plane (eTable 1). After administration of 0.2 mmol/kg of gadoterate meglumine (Dotarem®, Guerbet, Roissy, France), CINE cardiac-gated balanced steady state free precession (bSSFP) in double oblique SA plane (whole LV coverage), and in three standardized long axis (LA) planes (2-, 3-, and 4-chamber views) were acquired. At approximately 10-12 minutes after GBCA administration, cardiac-gated late gadolinium enhanced phase-sensitive inversion recovery (PSIR) T1-weighted images were acquired, in the same SA plane (whole LV coverage), and LA planes (eTable 1).

All imaging was performed on clinical 1.5T or 3T 70 cm wide bore clinical MRI systems (1.5T Optima MR450w, 1.5T Signa Artist, 3T Signa Architect, 3T Signa Premier, GE Healthcare, Waukesha, WI) using a 12-20 channel phased-array torso receive coil, using posterior elements embedded in the scanner table.

Evaluation of the LV and right ventricle (RV) was performed using a commercial cardiac MRI analysis package (cvi42® software, Circle Cardiovascular Imaging, Calgary, Alberta, Canada) to provide the following measurements: LV and RV ejection fraction (LVEF, RVEF), LV and RV stroke volume index (LVSVi, RVSVi), LV and RV end-diastolic volume (LVEDVi, RVEDVi), and LV mass index. Measurements of ventricular volumes and LV mass were performed in standard fashion using short axis cine images<sup>1</sup>. For global assessment of T1 and T2 relaxation times, a single region of interest (ROI) was placed carefully within the mid portion of the ventricular septum on T1 and T2 maps, in areas free from artifacts or partial volume effects with the adjacent blood pool<sup>1</sup>. Additional ROIs were drawn to assess T1 and T2 values within areas of abnormal T2 signal (on T2-weighted black blood images) and focal LGE<sup>1</sup>.

### *Data Collection*

In addition to MRI, demographic data and the following clinical data were collected: age, sex, type and date of COVID-19 testing; date of onset COVID-19 symptoms and detailed characteristics of these symptoms; record of hospitalization, if any; date of cardiac MRI; athlete's sport; systolic and diastolic blood pressure at rest (mmHg); height (m) and weight (kg). Body mass index (BMI, kg/m<sup>2</sup>) and body surface area (BSA, m<sup>2</sup>) were calculated<sup>2</sup>. Clinical symptoms were categorized as mild (headache, cough, fatigue, congestion, sore throat, myalgias, body aches, loss of smell and taste, nausea and vomiting), moderate (fever and chills, chest pain and mild dyspnea) and severe (severe dyspnea, hypoxia, symptoms requiring hospitalization). Additional diagnostic tests included TTE, serum troponin-I (normal range 0.0-0.03 ng/mL), B-type natriuretic peptide (BNP, normal range 0-99 pg/mL), C-reactive protein (CRP, normal range 0.0-1.0 mg/dL), erythrocyte sedimentation rate (ESR, normal range 0-20 mm/hr), and chest radiograph (if performed). All ECG were compared to baseline ECG, performed as part of pre-participation evaluation and interpreted using modified interpretation criteria for athletes<sup>3</sup>. Any changes in ECG from baseline are reported.

### *Statistical Analysis*

Descriptive data analysis and statistical analyses were performed using GraphPad Prism 8.1 (v8.1, GraphPad Software, Inc., San Diego, California) and Excel (v16.30, Microsoft, Redmond, Washington). Continuous data are presented as mean ± standard deviation (SD), and categorical data as absolute numbers and percentages. 95% confidence interval for prevalence of MRI findings consistent with myocarditis was determined using the Wilson score without continuity correction<sup>4</sup>.

**eTable 1. Cardiac MRI Protocol.**

| Parameter            | T2w DIR-FSE<br>1.5T / 3T  | T1 Map<br>1.5T / 3T   | T2 Map<br>1.5T / 3T  | Inject GBCA <sup>a</sup> | CINE IR<br>(Scout) | CINE bSSFP<br>1.5T / 3T                             | T1w PSIR<br>1.5T / 3T <sup>b</sup>                  |
|----------------------|---------------------------|-----------------------|----------------------|--------------------------|--------------------|-----------------------------------------------------|-----------------------------------------------------|
| TR (ms)              | def                       | 3.0 / 2.9             | def                  |                          | 3.0 / 3.1          | 3.2 / 3.0                                           | 4.7 / 6.1                                           |
| TE (ms)              | 102 / 102                 | 1.0 / 1.2             | 4 values<br>~12-80ms |                          | 1.2 / 1.4          | 1.3 / 1.2                                           | 2.2 / 2.8                                           |
| Flip angle           | 90 + refocusing           | 35                    | 90 + refocusing      |                          | 5                  | 45                                                  | 25 / 20                                             |
| TI (ms)              | n/a                       | 8 values<br>~150ms-5s | n/a                  |                          | n/a                | n/a                                                 | determined by<br>CINE IR                            |
| Slice thickness (mm) | 8 / 7                     | 8 / 7                 | 7                    |                          | 10 / 7             | 8 / 7                                               | 8 / 7                                               |
| Slice gap (mm)       | 0 / 0                     | n/a                   | n/a                  |                          | n/a                | 0 / 0                                               | 0 / 0                                               |
| Acquisition matrix   | 256x224                   | 168x148               | 200x160              |                          | 128x128            | 224x192 / 224x224                                   | 224x160                                             |
| Slices               | Full LV<br>coverage in SA | 3 SA slices           | 3 SA slices          |                          | 1 SA slice         | Full LV coverage in<br>SA; 3 LA slices <sup>c</sup> | Full LV coverage in<br>SA; 3 LA slices <sup>c</sup> |

<sup>a</sup> 0.2 mmol/kg of gadoterate meglumine (Dotarem®, Guerbet, Roissy, France)

<sup>b</sup> Images were acquired ~10-12 minutes after administration of gadolinium based contrast agent (GBCA).

<sup>c</sup> For long axis (LA), slices in 2-, 3- and 4-chamber view were acquired

Abbreviations: bSSFP, balanced steady state free precession; def, defined by RR interval; FOV, field of view; LA, long axis; LV, left ventricle; T2w DIR-FSE, T2-weighted double inversion recovery fat-saturated T2-weighted fast spin echo; T1w PSIR, T1-weighted phase sensitive inversion recovery (PSIR); SA, short axis; TE, echo time; TI, inversion time; TR, repetition time; n/a, not applicable

**eTable 2: Clinical and quantitative cardiac MRI parameters of two athletes recovering from COVID-19 with MRI findings consistent with myocarditis.**

|                                                      | <b>Patient 1<sup>a</sup><br/>Myopericarditis</b>                                           | <b>Patient 2<sup>a</sup><br/>Myocarditis</b>                                            |
|------------------------------------------------------|--------------------------------------------------------------------------------------------|-----------------------------------------------------------------------------------------|
| <b>Cardiac MRI</b>                                   |                                                                                            |                                                                                         |
| LVEF (%)                                             | 51                                                                                         | 58                                                                                      |
| LV mass index (g/m <sup>2</sup> )                    | 63                                                                                         | 58                                                                                      |
| LVCI (L/min/m <sup>2</sup> )                         | 2.7                                                                                        | 2.6                                                                                     |
| LVEDVi (mL/m <sup>2</sup> )                          | 116                                                                                        | 122                                                                                     |
| LVESVi (mL/m <sup>2</sup> )                          | 56                                                                                         | 51                                                                                      |
| LVSVi (mL/m <sup>2</sup> )                           | 60                                                                                         | 71                                                                                      |
| RVEF (%)                                             | 49                                                                                         | 52                                                                                      |
| RVCI (L/min/m <sup>2</sup> )                         | 2.6                                                                                        | 2.7                                                                                     |
| RVEDVi (mL/m <sup>2</sup> )                          | 119                                                                                        | 138                                                                                     |
| RVESVi (mL/m <sup>2</sup> )                          | 60                                                                                         | 66                                                                                      |
| RVSVi (mL/m <sup>2</sup> )                           | 58                                                                                         | 72                                                                                      |
| Native T1 septum (ms)                                | 1156                                                                                       | 1181                                                                                    |
| Native T1 LGE areas (ms)                             | 1223                                                                                       | 1250                                                                                    |
| Native T2 septum (ms)                                | 45                                                                                         | n/a                                                                                     |
| Native T2 LGE areas (ms)                             | 57                                                                                         | n/a                                                                                     |
| LGE / edema present                                  | yes / yes                                                                                  | yes / yes                                                                               |
| LGE findings                                         | Predominantly distal LV inferolateral wall                                                 | Inferior basal LV wall; Inferior RV insertion                                           |
| <b>TTE</b>                                           |                                                                                            |                                                                                         |
| Abnormal findings                                    | Mild reduction in global LV strain (GLS -15.4%)                                            | no                                                                                      |
| <b>ECG</b>                                           |                                                                                            |                                                                                         |
| Change to baseline                                   | ST and T wave changes in anterolateral leads                                               | no                                                                                      |
| <b>Blood parameters</b>                              |                                                                                            |                                                                                         |
| Troponin-I (ng/mL)                                   | 0.03, 0.04, 0.09 <sup>b</sup>                                                              | 0.01                                                                                    |
| BNP (pg/mL)                                          | 17                                                                                         | 23                                                                                      |
| ESR (mm/hr)                                          | 0                                                                                          | 5                                                                                       |
| CRP (mg/dL)                                          | 0.1                                                                                        | 0.1                                                                                     |
| <b>CoV-19 positive test - MRI (days)<sup>c</sup></b> | 11                                                                                         | 19                                                                                      |
| <b>CoV-19 symptoms</b>                               | Initially asymptomatic; one episode of mild dyspnea reported on 1-month clinical follow-up | Fever, myalgias, cough, mild dyspnea, sore throat, congestion, diminished loss of taste |

<sup>a</sup> Gender, age, sex, sport and other characteristics (weight, height, BMI) are not included to protect patient privacy. Both patients were imaged on a 3T system

<sup>b</sup> Troponin-I was normal one day prior to the cardiac MRI (0.03 ng/mL), however, increased to 0.04 ng/ml and 0.09ng/ml, two and four days after the cardiac MRI exam, respectively

<sup>c</sup> Time between onset of symptoms in patient with COVID-19 and cardiac MRI

Abbreviations: BNP, B-type natriuretic peptide; CI, cardiac index; CRP, C-reactive protein; CoV-19, COVID-19; EDVi, end-diastolic volume index; EF, ejection fraction; ESR, erythrocyte sedimentation rate; ESVi, end-systolic volume index; GLS, global longitudinal strain; LGE, late gadolinium enhancement; LV, left ventricular; n/a, not available; TTE, transthoracic echocardiography; RV, right ventricular; SVi, stroke volume index

**Reference values:** BNP: ≤99 pg/mL; CRP: ≤1.0 mg/dL; ESR: males <15mm/h (for age group 0-50 years), females <20mm/h (for age group 0-50 years); Troponin-I: ≤0.03 ng/mL

**eTable 3: Number of athletes with COVID-19 and documented specific symptoms during the course of their disease.**

| <b>SARS-CoV-2 symptoms</b> | <b>All Athletes<br/>(n=145)</b> | <b>Male Athletes<br/>(n=108)</b> | <b>Female Athletes<br/>(n=37)</b> |
|----------------------------|---------------------------------|----------------------------------|-----------------------------------|
| Nasal congestion           | 56 (38.6)                       | 45 (41.7)                        | 11 (29.7)                         |
| Headache                   | 51 (35.2)                       | 32 (29.6)                        | 19 (51.4)                         |
| Sore throat                | 49 (33.8)                       | 32 (29.6)                        | 17 (45.9)                         |
| Loss of smell              | 47 (32.4)                       | 39 (36.1)                        | 8 (21.6)                          |
| Loss of taste              | 41 (28.3)                       | 32 (29.6)                        | 9 (24.3)                          |
| Cough                      | 39 (26.9)                       | 25 (23.1)                        | 14 (37.8)                         |
| Fatigue                    | 38 (26.2)                       | 28 (25.9)                        | 10 (27.0)                         |
| Myalgias                   | 33 (22.8)                       | 19 (17.6)                        | 14 (37.8)                         |
| Fever, chills              | 30 (20.7)                       | 19 (17.6)                        | 11 (29.7)                         |
| Shortness of breath        | 9 (6.2)                         | 6 (5.6)                          | 3 (8.1)                           |
| Chest pain                 | 7 (4.8)                         | 4 (3.7)                          | 3 (8.1)                           |
| Diarrhea                   | 7 (4.8)                         | 6 (5.6)                          | 1 (2.7)                           |
| Nausea, Vomiting           | 6 (4.1)                         | 4 (3.7)                          | 2 (5.4)                           |
| Asymptomatic               | 24 (16.6)                       | 17 (15.7)                        | 7 (18.9)                          |

Data are number (%).

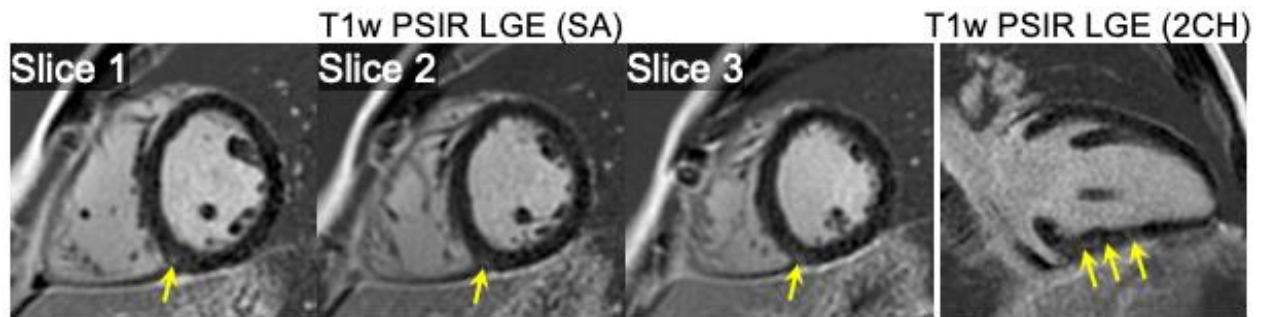

**eFigure.** Nonspecific inferior-septal right ventricular insertion point late gadolinium enhancement.

Mild nonspecific focal enhancement at the inferior-septal right ventricular insertion point in one of the athletes (yellow arrows). No corresponding elevated T2-weighted signal or wall motion abnormalities were observed. Serum troponin-I was negative in this patient. Shown are T1-weighted phase sensitive inversion recovery images with late gadolinium enhancement (T1w PSIR LGE) in three contiguous short axis (SA) slices and the two-chamber view (2CH).

**eReferences.**

1. Schulz-Menger J, Bluemke DA, Bremerich J, et al. Standardized image interpretation and post-processing in cardiovascular magnetic resonance - 2020 update: Society for Cardiovascular Magnetic Resonance (SCMR): Board of Trustees Task Force on Standardized Post-Processing. *J Cardiovasc Magn Reson.* 2020;22(1):19. doi:10.1186/s12968-020-00610-6
2. DuBois D, DuBois E. A formula to estimate the approximate surface area if height and weight be known. *Arch Intern Med.* 1916;(17):863-871.
3. Drezner JA, Sharma S, Baggish A, et al. International criteria for electrocardiographic interpretation in athletes: Consensus statement. *Br J Sports Med.* 2017;51(9):704-731. doi:10.1136/bjsports-2016-097331
4. Newcombe RG. Two-sided confidence intervals for the single proportion: comparison of seven methods. *Stat Med.* 1998;17(8):857-872.
